# Supplementary material for: Mapping gene flow between ancient hominins through demography-aware inference of the ancestral recombination graph
Source: PubMed Central journal article supplement (PMC7410169; doi:10.1371/journal.pgen.1008895), 2020-08-06
Supplement: pgen.1008895.s002.pdf [file pgen.1008895.s002.pdf]

**S1 Table. Sup→Den regions overlapping Den→Hum regions predicted by the CRF**

| Location (hg19)          | count | overlapping genes                                                            |
|--------------------------|-------|------------------------------------------------------------------------------|
| chr15:56880301-56943860  | 10    | RP11-1129I3.1, ZNF280D                                                       |
| chr5:35268551-35472820   | 9     | U3                                                                           |
| chr15:79936231-80045380  | 7     |                                                                              |
| chr2:183978771-184038340 | 7     | NUP35                                                                        |
| chr1:40622111-40751801   | 6     | RLF, RNU6-1237P, TMCO2, RP1-39G22.7, ZMPSTE24                                |
| chr4:143486431-143606100 | 6     | INPP4B, RP11-223C24.1                                                        |
| chr15:63493991-63599658  | 5     | RAB8B, APH1B                                                                 |
| chr17:30992260-31232970  | 3     | MYO1D, RP11-220C2.1, Y_RNA, AC084809.2, AC084809.3                           |
| chr5:74577091-74897550   | 3     | CTD-2235C13.2, HMGCR, COL4A3BP, CTD-2235C13.3, POLK, RNU7-175P, CTC-366B18.2 |
| chr20:18369011-18456230  | 3     | DZANK1, RNA5SP476, POLR3F, MIR3192                                           |
| chr2:104441221-104575299 | 2     | AC013727.1, AC013727.2, RP11-76I14.1                                         |
| chr3:156394341-156515810 | 2     | TIPARP, RP11-392A22.2                                                        |
| chr8:97918711-98192640   | 2     | CPQ, KB-1958F4.2, KB-1958F4.1                                                |
| chr8:56673021-56798570   | 2     | TMEM68, TGS1, LYN                                                            |
| chr13:77606499-77899730  | 1     | MYCBP2, MYCBP2-AS1, RP11-226E21.2                                            |
| chr4:85723291-85798820   | 1     | WDFY3, RP11-147K21.1                                                         |
| chr6:131062559-131237440 | 1     | SMLR1, EPB41L2                                                               |
| chr7:83335141-83452959   | 1     |                                                                              |
| chr10:52582401-52700350  | 1     | A1CF, RP11-449O16.2                                                          |
| chr3:129951121-130100515 | 1     | COL6A5, AC093004.1                                                           |

The “count” column shows the number of non-African SGDP individuals who have Denisovan introgression at this locus. We restricted this list to Sup→Den regions for which at least 90% of SGDP individuals without Denisovan introgression have a higher divergence to the Denisovan than to Neanderthals.
